# Supplementary material for: Cation-based approach to morphological diversity of diphenylalanine dipeptide structures
Source: Royal Society of Chemistry journal article supplement (doi:10.1039/d1sm00083g), 2021-01-01
Supplement: d1sm00083g1.pdf [file d1sm00083g1.pdf]

# Cation-Based Approach to Morphological Diversity of Diphenylalanine Dipeptide Structures

Hakan ERDOGAN\*

University of Health Sciences Turkey, Gülhane Faculty of Pharmacy, Department of  
Pharmaceutical Chemistry, 06018 Ankara, Turkey

\*Corresponding Author: [hakan.erdogan@sbu.edu.tr](mailto:hakan.erdogan@sbu.edu.tr)

## Supporting Information

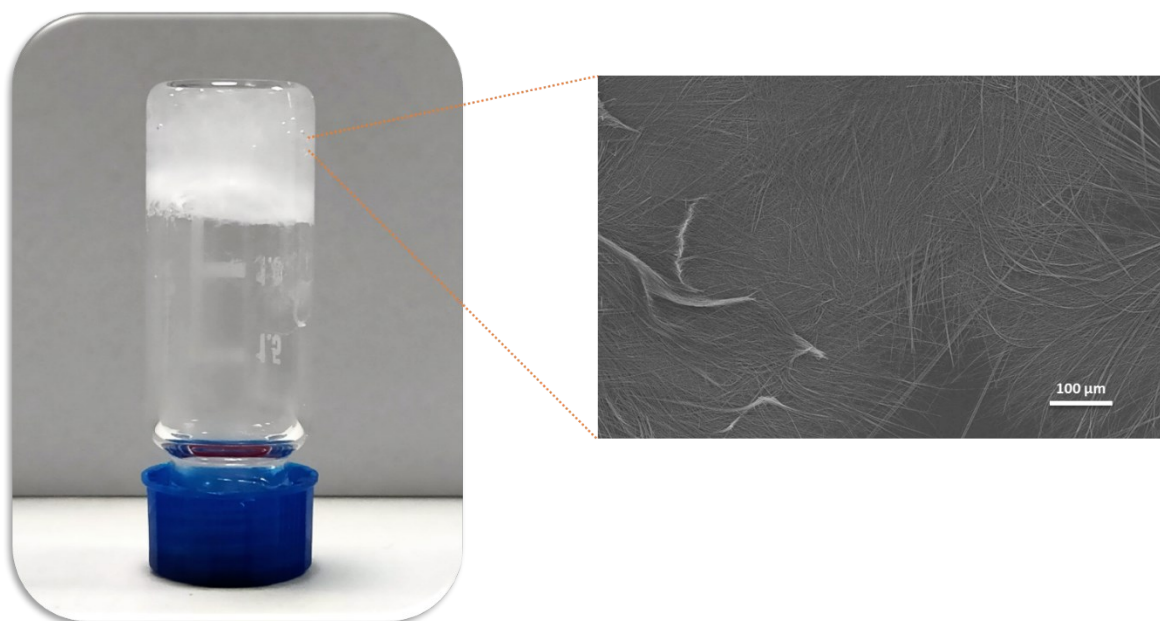

**SI1. Gel formation of the FF dipeptide presence of Pb<sup>2+</sup> ions**

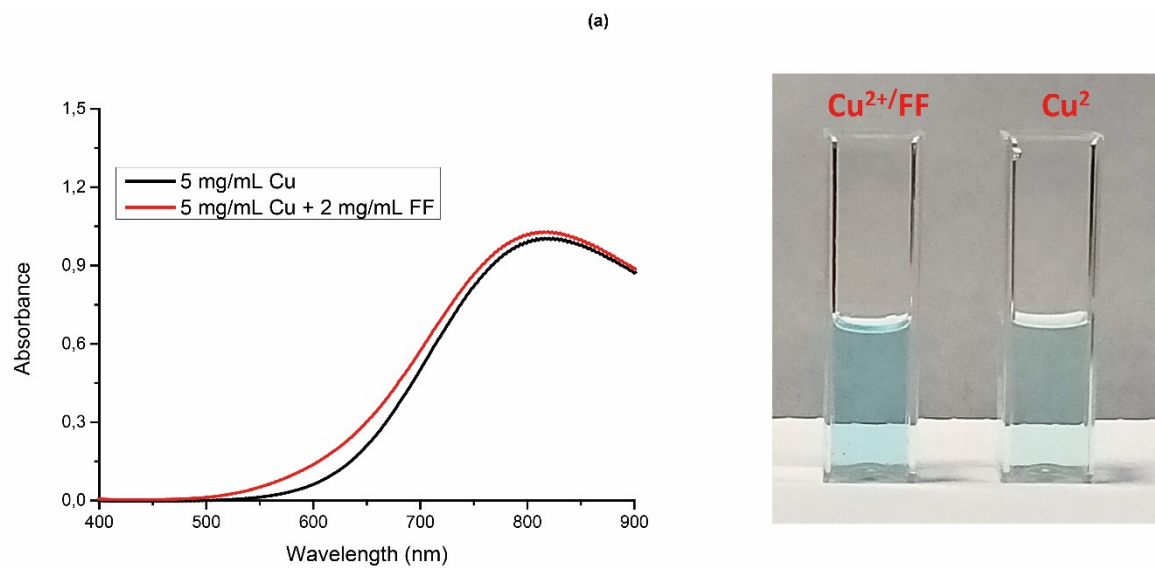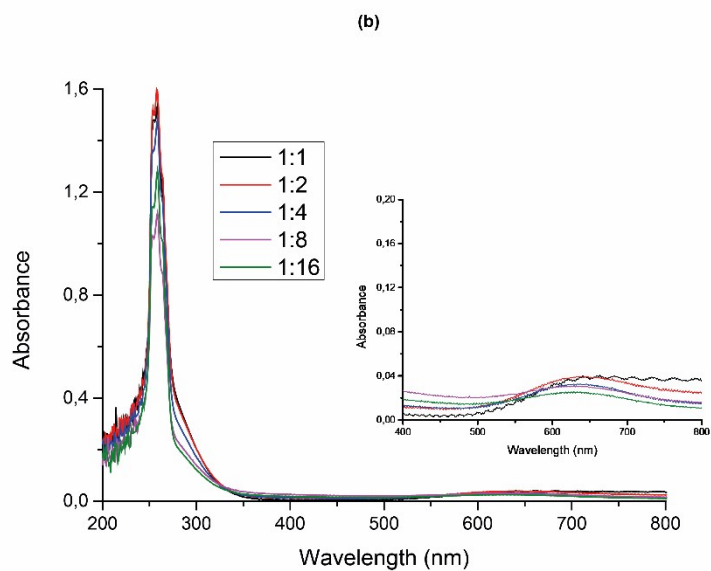

**SI2. a) UV-vis spectra of the FF dipeptide Cu<sup>2+</sup> systems b) UV-vis spectra of the FF dipeptide Cu<sup>2+</sup> systems at various concentration rate**

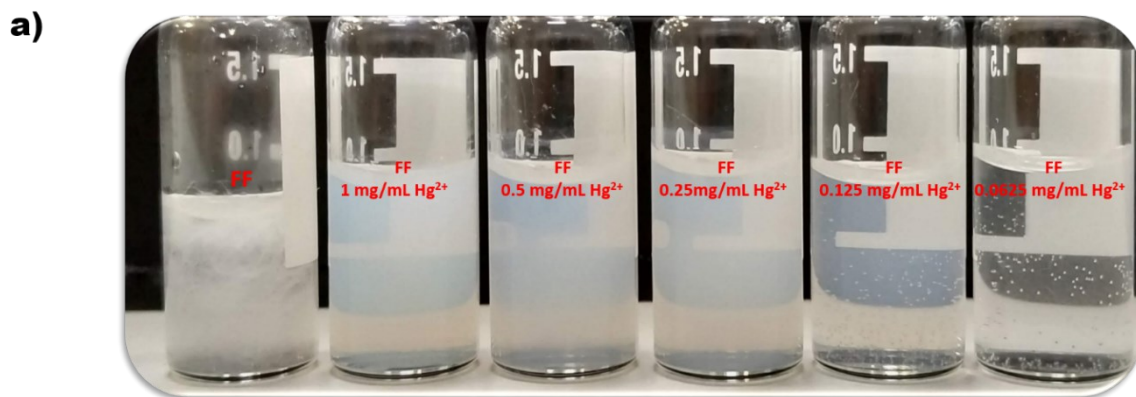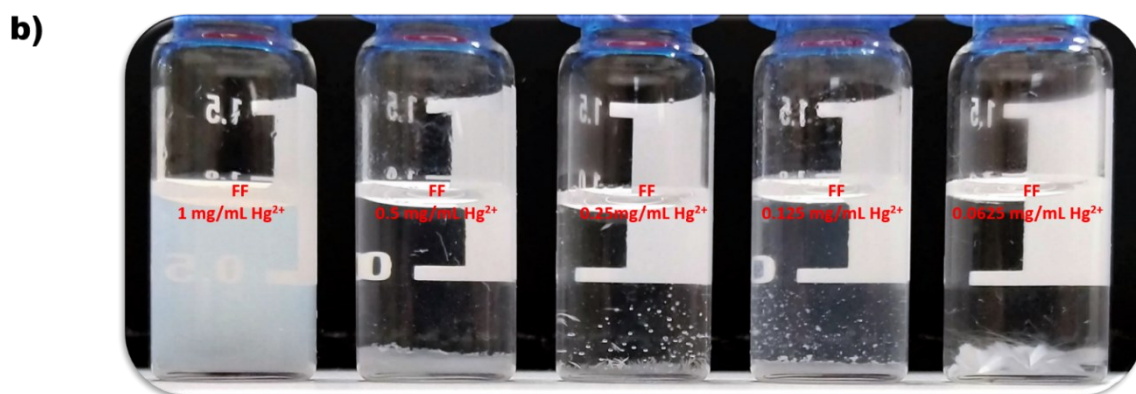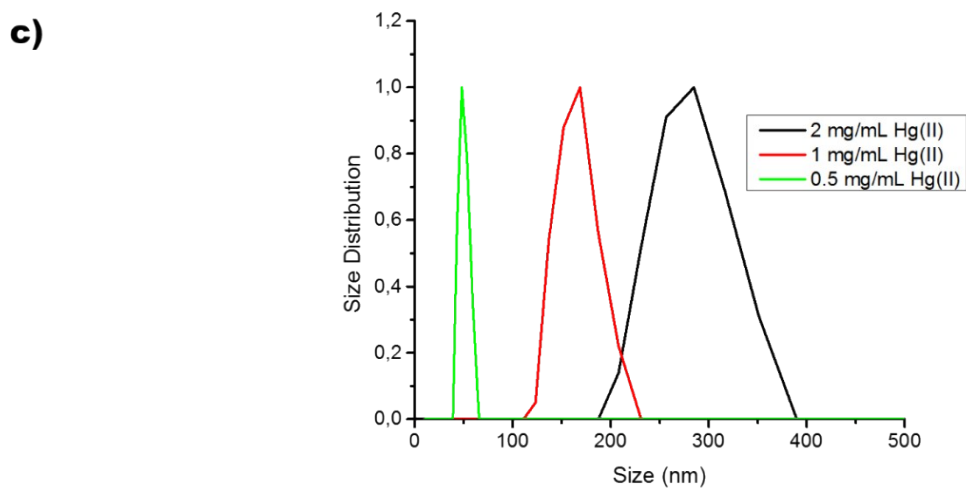

**SI3. a) FF dipeptide structures formed in the presence of  $\text{Hg}^{2+}$  cations, b) After 1 day incubation time self-assembled FF dipeptide at various concentration  $\text{Hg}^{2+}$  cations; 1 mg/mL, 0.5 mg/mL 0.25 mg/mL, 0.125 mg/mL, 0.0625 mg/mL c) size distribution of the dipeptide structures.**

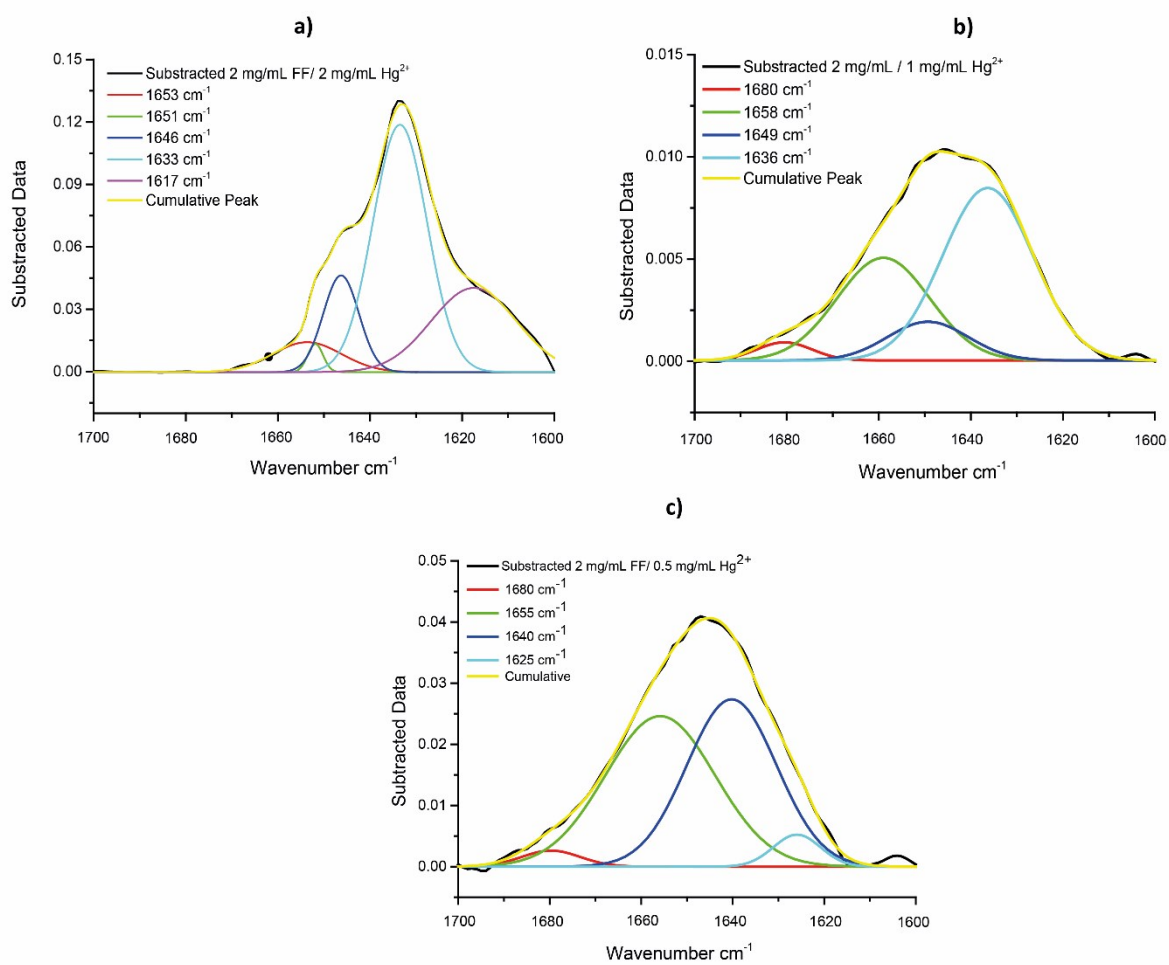

**SI4. Deconvoluted FTIR spectrums at range 1700-1600  $\text{cm}^{-1}$  a) 2 mg/mL FF/2 mg/mL  $\text{Hg}^{2+}$ , b) 2 mg/mL FF/1 mg/mL  $\text{Hg}^{2+}$  c) 2 mg/mL FF/0.5 mg/mL  $\text{Hg}^{2+}$**
